# Supplementary material for: Zobellia barbeyronii sp. nov., a New Member of the Family Flavobacteriaceae, Isolated from Seaweed, and Emended Description of the Species Z. amurskyensis, Z. laminariae, Z. russellii and Z. uliginosa
Source: MDPI journal article supplement (doi:10.3390/d13110520), 2021-10-22
Supplement: s1 [file s1]

## Supplementary materials

“*Zobellia barbeyronii* sp. nov., a new member of the family *Flavobacteriaceae*, isolated from seaweed, and emended description of the species *Z. amurskyensis*, *Z. laminariae*, *Z. russellii* and *Z. uliginosa*”

Olga Nedashkovskaya <sup>1,\*</sup>, Nadezhda Otstavnykh <sup>1</sup>, Natalia Zhukova <sup>2</sup>, Konstantin Guzev <sup>1</sup>, Viktoria Chausova <sup>1</sup>, Liudmila Tekutyeva <sup>3</sup>, Valery Mikhailov <sup>1</sup>, and Marina Isaeva <sup>1,\*</sup>

<sup>1</sup> G.B. Elyakov Pacific Institute of Bioorganic Chemistry, Far Eastern Branch, Russian Academy of Sciences, 159, Pr. 100 let Vladivostoku, 690022 Vladivostok, Russia; chernysheva.nadezhda@gmail.com (N.O.); k.guzev@gmail.com (K.G.); v.chausova@gmail.com (V.C.); vvmikhailov@inbox.ru (V.M.)

<sup>2</sup> A.V. Zhirmunsky National Scientific Center of Marine Biology of the Far Eastern Branch of the Russian Academy of Sciences, Palchevskogo str. 17, Vladivostok 690041, Russia; nzhukova35@list.ru (N.Z.)

<sup>3</sup> Innovative Technology Center, Innovative Technology Center, Basic Department of Bioeconomics and Food Security, School of Economics and Management, Far Eastern Federal University, 8 Suhanova St., Vladivostok 690950, Russia; tekuteva.la@dvfu.ru (L.T.)

\* Correspondence: oned2004@mail.ru (O.N.); issaeva@gmail.com (M.I.); Tel.: +7-914-702-0915

Submitted to Diversity.

**Table S1.** MLSA primers designed based on genome sequence of the 36-CHABK-3-33T used for estimation of intraspecies genetic variability.

| Locus       | Primer name | Primer sequence<br>(5'→3') | Length,<br>bp | GC-<br>content,<br>% | T <sub>m</sub> , °C | Amplicon<br>size (bp) |
|-------------|-------------|----------------------------|---------------|----------------------|---------------------|-----------------------|
| <i>dnaK</i> | Zsp-DnaK-F  | CGGTAACCAACCCTCACAACACT    | 23            | 52.2                 | 56.7                | 1524                  |
|             | Zsp-DnaK-R  | ATTCGCCTAAAGCATCTTCTATTG   | 24            | 37.5                 | 53.2                |                       |
| <i>gyrB</i> | Zsp-gyrB-F  | GGAGATGTGGGCGTTAGAGGTC     | 22            | 59.1                 | 56.4                | 1167                  |
|             | Zsp-gyrB-R  | AGAACAATCGGAAAGTTTACCAGG   | 24            | 41.7                 | 54.7                |                       |
| <i>pyrH</i> | Zsp-pyrH-F  | AGCGGTGAAGCCTTAATGGG       | 20            | 55.0                 | 55.7                | 497                   |
|             | Zsp-pyrH-R  | GTAGCATTCCTTATCCTTTTCAGGG  | 24            | 41.7                 | 52.6                |                       |
| <i>recA</i> | Zsp-recA-F  | ACAAGACTTACGGAAAAGGTGCC    | 23            | 47.8                 | 55.5                | 834                   |
|             | Zsp-recA-R  | CGCCATAACTGAACCATGAACC     | 22            | 50.0                 | 55.8                |                       |
| <i>topA</i> | Zsp-topA-F  | TACCATAGCATCGCAAATGAGTG    | 23            | 43.5                 | 54.5                | 1432                  |
|             | Zsp-topA-R  | CGCTTTTGGCTTCGCTTTAG       | 20            | 50.0                 | 54.6                |                       |

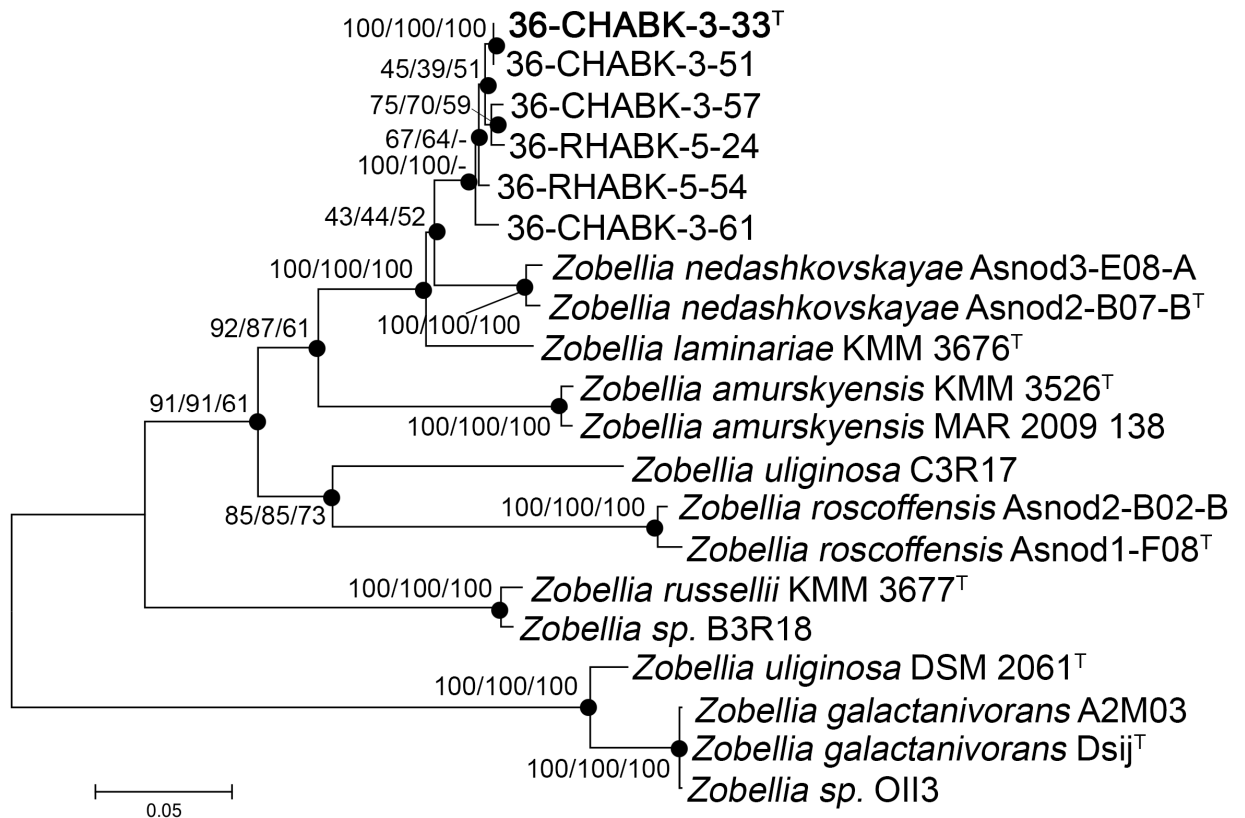

**Figure S1.** Maximum-likelihood (ML) phylogenetic tree based on concatenated partial *dnaK-gyrB-pyrH-recA-topA* (2,570 bp) gene sequences, showing the phylogenetic position of six alga-associated isolates and members of the genus *Zobellia*. The ML tree was inferred using the GTR+G+I model recommended by MEGA v.7. Bootstrap values in the order ML/NJ/MP are based on 500/1000/1000 replications. Bar, 0.05 substitutions per nucleotide position.

**Table S2.** MLSA distances values for the selected strains used in this study.

| Standard error estimates             |                                                     | 1     | 2     | 3     | 4     | 5     | 6     | 7     | 8     | 9     | 10    | 11    | 12    | 13    | 14    | 15    | 16    | 17    | 18    | 19    | 20    |
|--------------------------------------|-----------------------------------------------------|-------|-------|-------|-------|-------|-------|-------|-------|-------|-------|-------|-------|-------|-------|-------|-------|-------|-------|-------|-------|
| Estimates of Evolutionary Divergence |                                                     |       |       |       |       |       |       |       |       |       |       |       |       |       |       |       |       |       |       |       |       |
| 1                                    | <i>Z. galactanivorans</i> Dsij <sup>T</sup>         |       | 0,001 | 0,005 | 0,012 | 0,012 | 0,011 | 0,012 | 0,010 | 0,011 | 0,011 | 0,011 | 0,011 | 0,010 | 0,011 | 0,012 | 0,012 | 0,011 | 0,012 | 0,011 | 0,001 |
| 2                                    | <i>Z. galactanivorans</i> OII3                      | 0,001 |       | 0,005 | 0,012 | 0,012 | 0,011 | 0,012 | 0,010 | 0,011 | 0,011 | 0,011 | 0,011 | 0,010 | 0,011 | 0,011 | 0,012 | 0,011 | 0,013 | 0,011 | 0,001 |
| 3                                    | <i>Z. uliginosa</i> DSM 2061 <sup>T</sup>           | 0,043 | 0,044 |       | 0,012 | 0,012 | 0,011 | 0,012 | 0,011 | 0,011 | 0,011 | 0,011 | 0,011 | 0,011 | 0,012 | 0,012 | 0,012 | 0,011 | 0,012 | 0,011 | 0,005 |
| 4                                    | <i>Z. amurskyensis</i> KMM 3526 <sup>T</sup>        | 0,213 | 0,213 | 0,204 |       | 0,002 | 0,009 | 0,007 | 0,007 | 0,007 | 0,007 | 0,007 | 0,007 | 0,007 | 0,007 | 0,009 | 0,009 | 0,007 | 0,008 | 0,009 | 0,012 |
| 5                                    | <i>Z. amurskyensis</i> MAR 2009 138                 | 0,212 | 0,213 | 0,202 | 0,008 |       | 0,009 | 0,007 | 0,007 | 0,007 | 0,007 | 0,007 | 0,007 | 0,007 | 0,007 | 0,009 | 0,009 | 0,007 | 0,008 | 0,009 | 0,012 |
| 6                                    | <i>Z. russellii</i> KMM 3677 <sup>T</sup>           | 0,225 | 0,226 | 0,214 | 0,160 | 0,163 |       | 0,011 | 0,010 | 0,010 | 0,010 | 0,010 | 0,010 | 0,010 | 0,011 | 0,011 | 0,011 | 0,011 | 0,009 | 0,002 | 0,011 |
| 7                                    | <i>Z. laminariae</i> KMM 3676 <sup>T</sup>          | 0,219 | 0,220 | 0,212 | 0,118 | 0,118 | 0,169 |       | 0,005 | 0,005 | 0,005 | 0,005 | 0,005 | 0,005 | 0,006 | 0,009 | 0,009 | 0,006 | 0,009 | 0,010 | 0,012 |
| 8                                    | 36-CHABK-3-33 <sup>T</sup>                          | 0,202 | 0,203 | 0,199 | 0,114 | 0,112 | 0,159 | 0,055 |       | 0,002 | 0,002 | 0,002 | 0,002 | 0,000 | 0,005 | 0,009 | 0,009 | 0,006 | 0,008 | 0,010 | 0,010 |
| 9                                    | 36-CHABK-3-57                                       | 0,206 | 0,207 | 0,205 | 0,113 | 0,111 | 0,163 | 0,057 | 0,009 |       | 0,002 | 0,002 | 0,002 | 0,002 | 0,005 | 0,009 | 0,009 | 0,006 | 0,008 | 0,010 | 0,011 |
| 10                                   | 36-CHABK-3-61                                       | 0,206 | 0,207 | 0,204 | 0,109 | 0,108 | 0,162 | 0,051 | 0,012 | 0,012 |       | 0,002 | 0,002 | 0,002 | 0,005 | 0,009 | 0,009 | 0,006 | 0,008 | 0,010 | 0,011 |
| 11                                   | 36-RHABK-5-24                                       | 0,207 | 0,207 | 0,203 | 0,110 | 0,109 | 0,161 | 0,056 | 0,010 | 0,009 | 0,014 |       | 0,002 | 0,002 | 0,005 | 0,009 | 0,009 | 0,006 | 0,008 | 0,010 | 0,011 |
| 12                                   | 36-RHABK-5-54                                       | 0,202 | 0,203 | 0,199 | 0,109 | 0,107 | 0,159 | 0,053 | 0,008 | 0,011 | 0,013 | 0,011 |       | 0,002 | 0,005 | 0,009 | 0,009 | 0,006 | 0,008 | 0,010 | 0,011 |
| 13                                   | 36-CHABK-3-51                                       | 0,202 | 0,203 | 0,199 | 0,114 | 0,112 | 0,159 | 0,055 | 0,000 | 0,009 | 0,012 | 0,010 | 0,008 |       | 0,005 | 0,009 | 0,009 | 0,006 | 0,008 | 0,010 | 0,010 |
| 14                                   | <i>Z. nedashkovskayae</i> Asnod3-E08-A              | 0,211 | 0,211 | 0,209 | 0,120 | 0,119 | 0,168 | 0,065 | 0,053 | 0,053 | 0,054 | 0,053 | 0,049 | 0,053 |       | 0,010 | 0,010 | 0,002 | 0,008 | 0,010 | 0,011 |
| 15                                   | <i>Z. roscoffensis</i> Asnod2-B02-B                 | 0,239 | 0,239 | 0,227 | 0,166 | 0,163 | 0,177 | 0,150 | 0,136 | 0,139 | 0,141 | 0,137 | 0,134 | 0,136 | 0,147 |       | 0,002 | 0,009 | 0,010 | 0,010 | 0,011 |
| 16                                   | <i>Z. roscoffensis</i> Asnod1-F08 <sup>T</sup>      | 0,238 | 0,237 | 0,229 | 0,165 | 0,162 | 0,182 | 0,149 | 0,139 | 0,142 | 0,144 | 0,141 | 0,137 | 0,139 | 0,148 | 0,012 |       | 0,009 | 0,010 | 0,011 | 0,012 |
| 17                                   | <i>Z. nedashkovskayae</i> Asnod2-B07-B <sup>T</sup> | 0,210 | 0,210 | 0,206 | 0,120 | 0,120 | 0,165 | 0,063 | 0,053 | 0,055 | 0,056 | 0,053 | 0,049 | 0,053 | 0,010 | 0,146 | 0,147 |       | 0,008 | 0,010 | 0,011 |
| 18                                   | <i>Z. uliginosa</i> C3R17                           | 0,233 | 0,234 | 0,227 | 0,145 | 0,144 | 0,166 | 0,144 | 0,135 | 0,138 | 0,135 | 0,134 | 0,133 | 0,135 | 0,142 | 0,144 | 0,147 | 0,141 |       | 0,009 | 0,012 |
| 19                                   | <i>Zobellia</i> sp. B3R18                           | 0,224 | 0,226 | 0,214 | 0,159 | 0,162 | 0,012 | 0,167 | 0,158 | 0,161 | 0,161 | 0,158 | 0,158 | 0,158 | 0,167 | 0,174 | 0,177 | 0,164 | 0,164 |       | 0,011 |
| 20                                   | <i>Z. galactanivorans</i> A2M03                     | 0,001 | 0,002 | 0,043 | 0,213 | 0,213 | 0,226 | 0,219 | 0,202 | 0,206 | 0,206 | 0,206 | 0,202 | 0,202 | 0,211 | 0,239 | 0,238 | 0,210 | 0,233 | 0,224 |       |
